# Supplementary material for: A comparative study on the design and application of new nano benzimidazolium gemini ionic liquids for curing interfacial properties of the crude oil–water system
Source: Royal Society of Chemistry journal article supplement (doi:10.1039/d3ra01783d), 2023-01-01
Supplement: d3ra01783d1.pdf [file d3ra01783d1.pdf]

## Supporting Information

### **A comparative study on the design and application of new benzimidazolium Gemini ionic liquids for curing interfacial properties of crude oil–water system**

Javad Saien, Mona Kharazi\*, Behnaz Shokri, Morteza Torabi, Mohammad Ali Zolfigol

*Faculty of Chemistry and Petroleum Science, Bu–Ali Sina University, Hamedan 6517838695, Iran*

\*E-mail addresses: [kharazi.mona@yahoo.com](mailto:kharazi.mona@yahoo.com) (M. Kharazi)

Number of Pages: 14

Number of Figures: 18

Number of Tables: 3

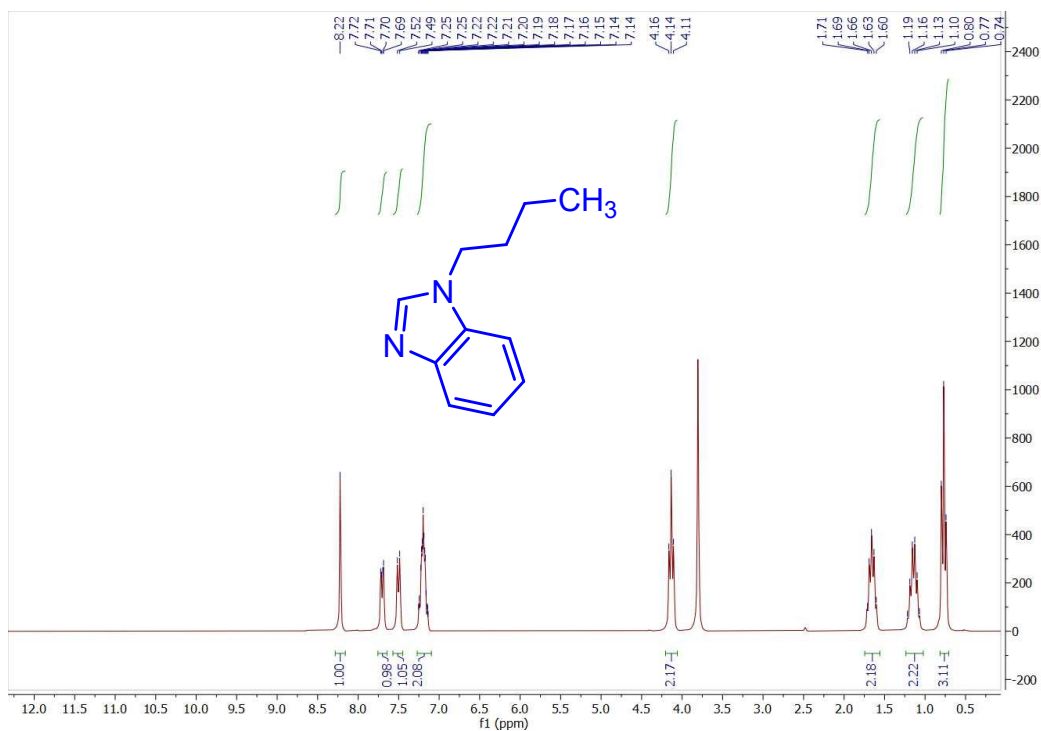

Figure S1.  $^1\text{H}$  NMR spectrum of 1-butyl-1H-benzo[d]imidazole.

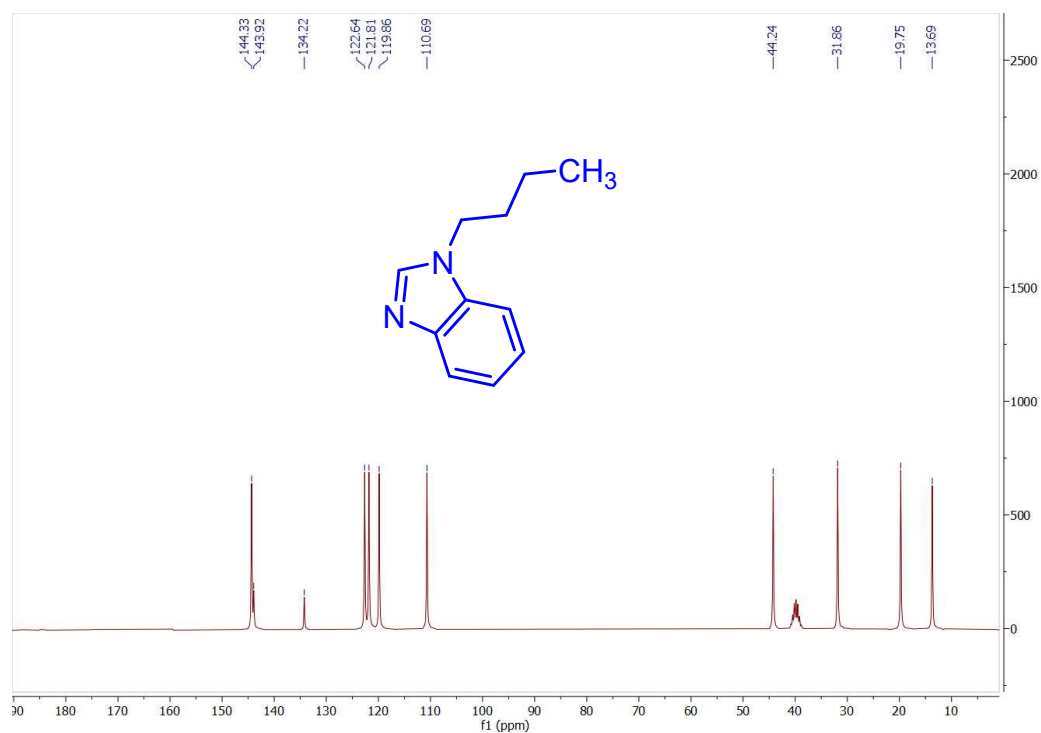

Figure S2.  $^{13}\text{C}$  NMR spectrum of 1-butyl-1H-benzo[d]imidazole.

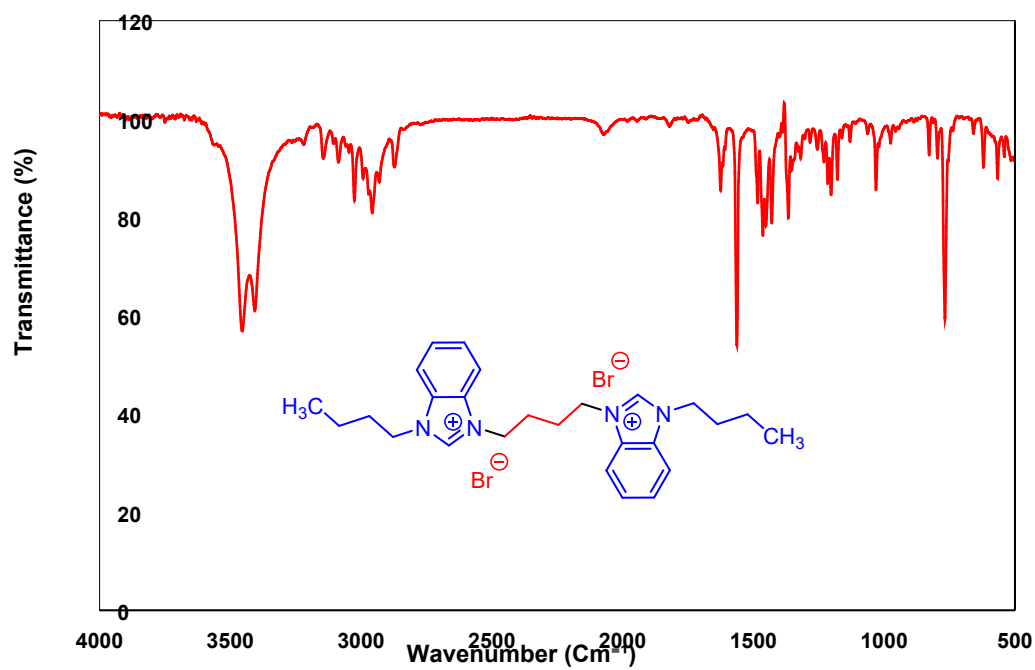

Figure S3. FT-IR spectrum of synthesized  $[C_4\text{benzim}-C_4\text{-benzim}C_4][Br_2]$ .

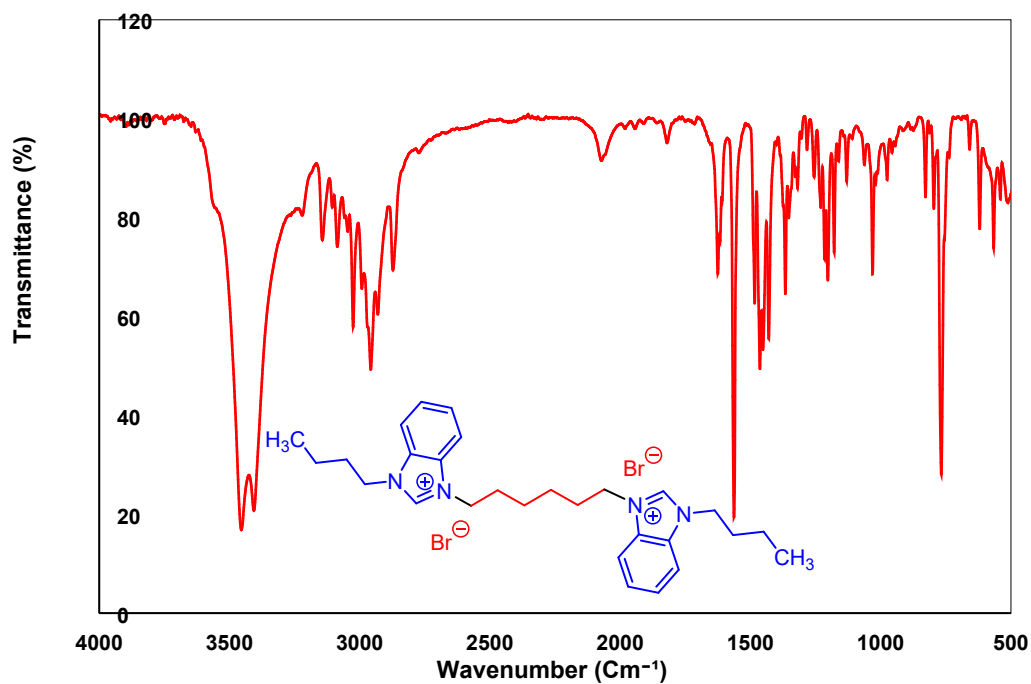

Figure S4. FT-IR spectrum of synthesized  $[C_4\text{benzim}-C_6\text{-benzim}C_4][Br_2]$ .

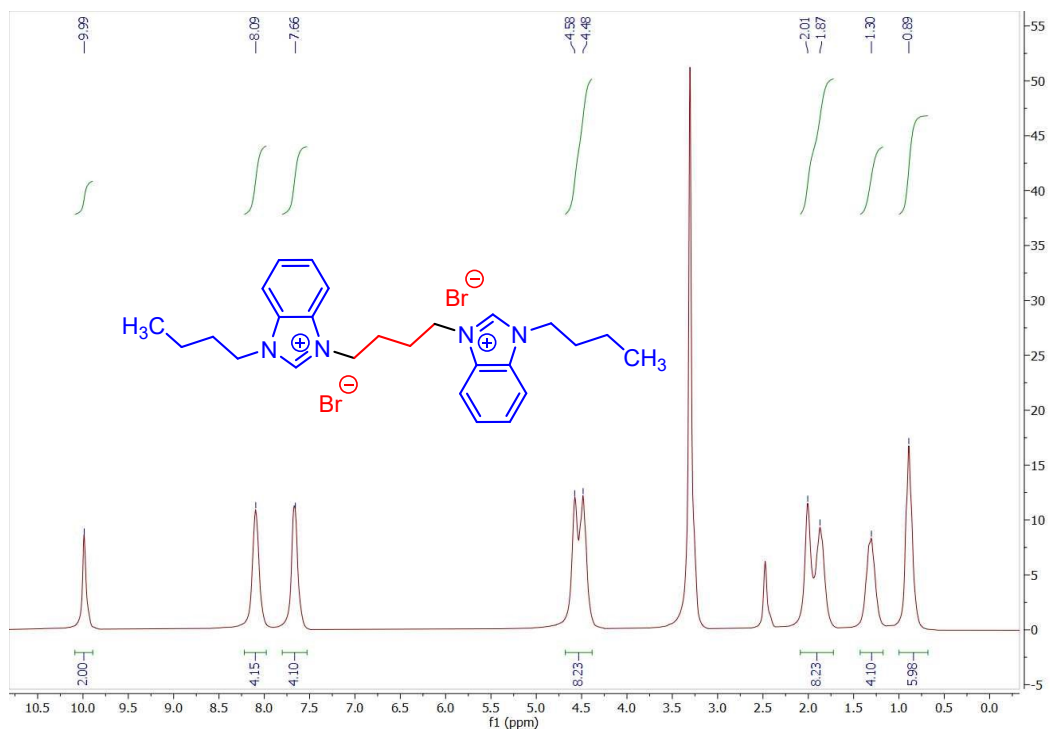

Figure S5.  $^1\text{H}$  NMR spectrum of synthesized  $[\text{C}_4\text{benzim-C}_4\text{-benzimC}_4][\text{Br}_2]$ .

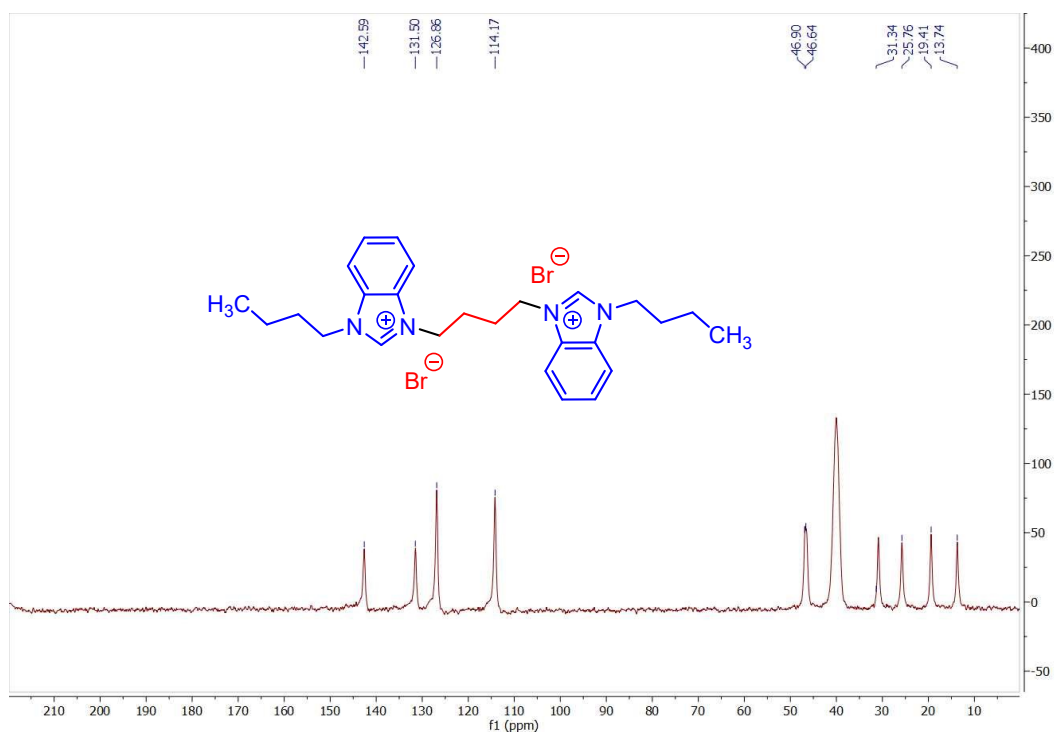

Figure S6.  $^{13}\text{C}$  NMR spectrum of synthesized  $[\text{C}_4\text{benzim-C}_4\text{-benzimC}_4][\text{Br}_2]$ .

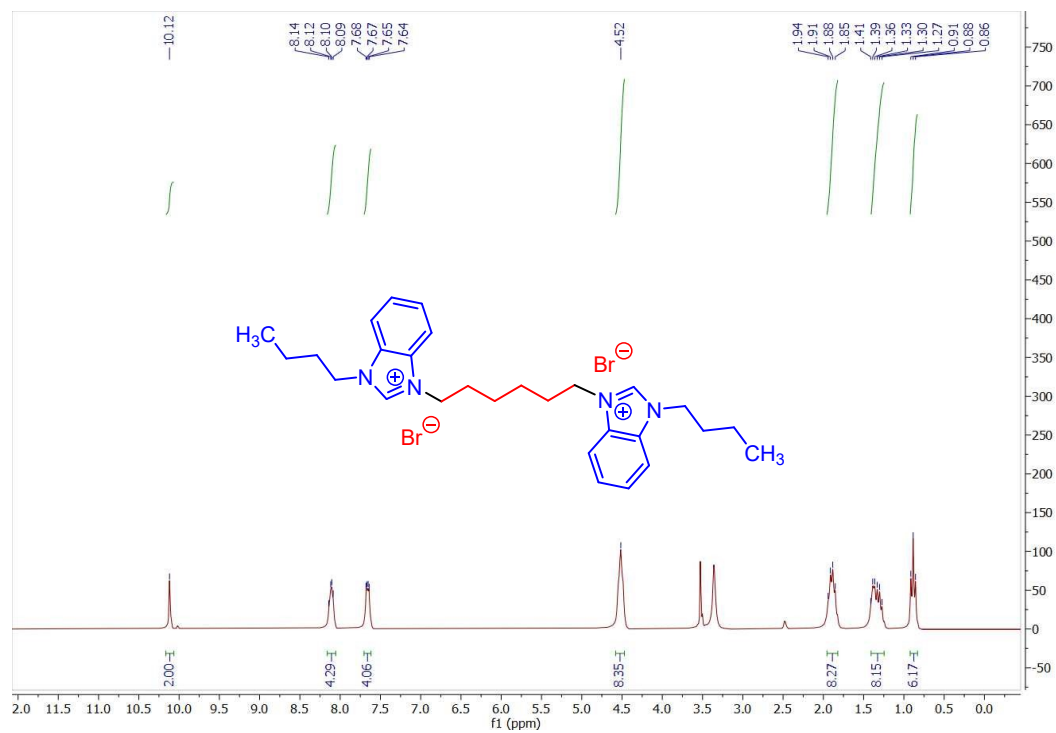

**Figure S7.**  $^1\text{H}$  NMR spectrum of synthesized  $[\text{C}_4\text{benzim-C}_6\text{-benzimC}_4][\text{Br}_2]$ .

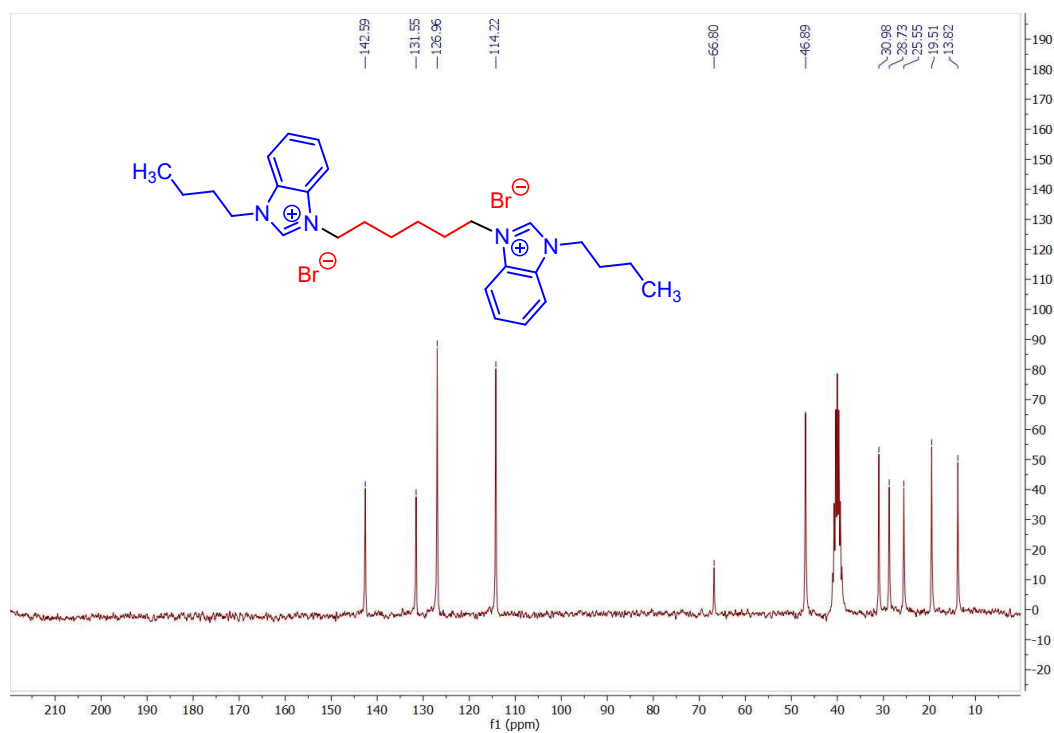

**Figure S8.**  $^{13}\text{C}$  NMR spectrum of synthesized  $[\text{C}_4\text{benzim-C}_6\text{-benzimC}_4][\text{Br}_2]$ .

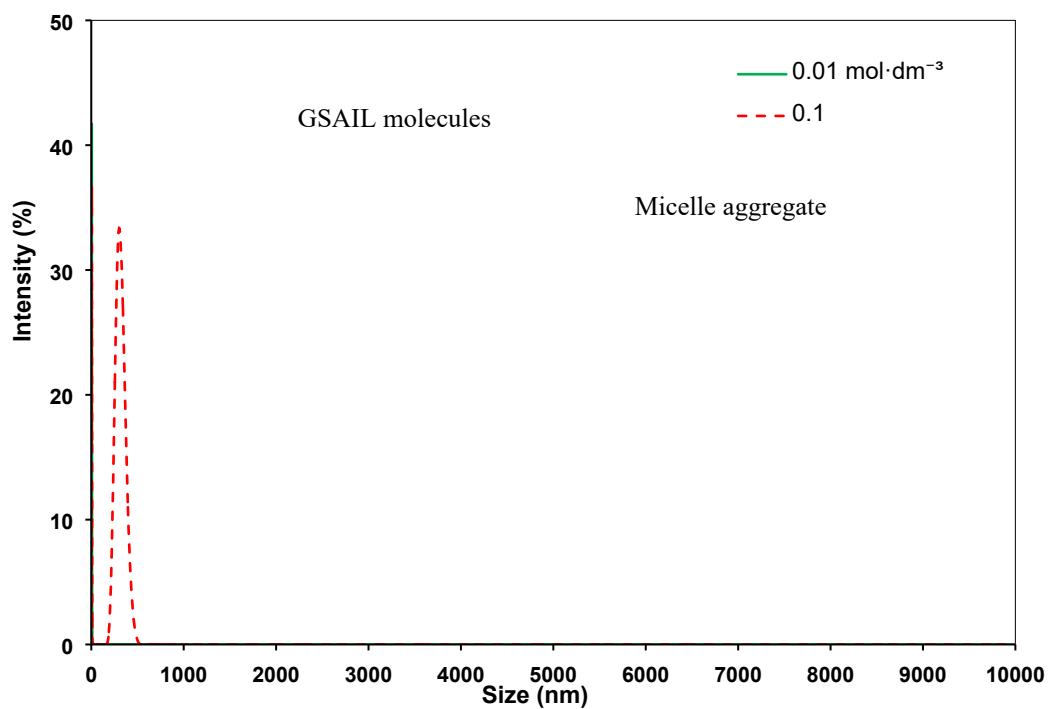

Figure S9. The DLS spectra of the of  $[C_4\text{benzim}-C_4\text{-benzim}C_4][Br_2]$  product before and after CMC.

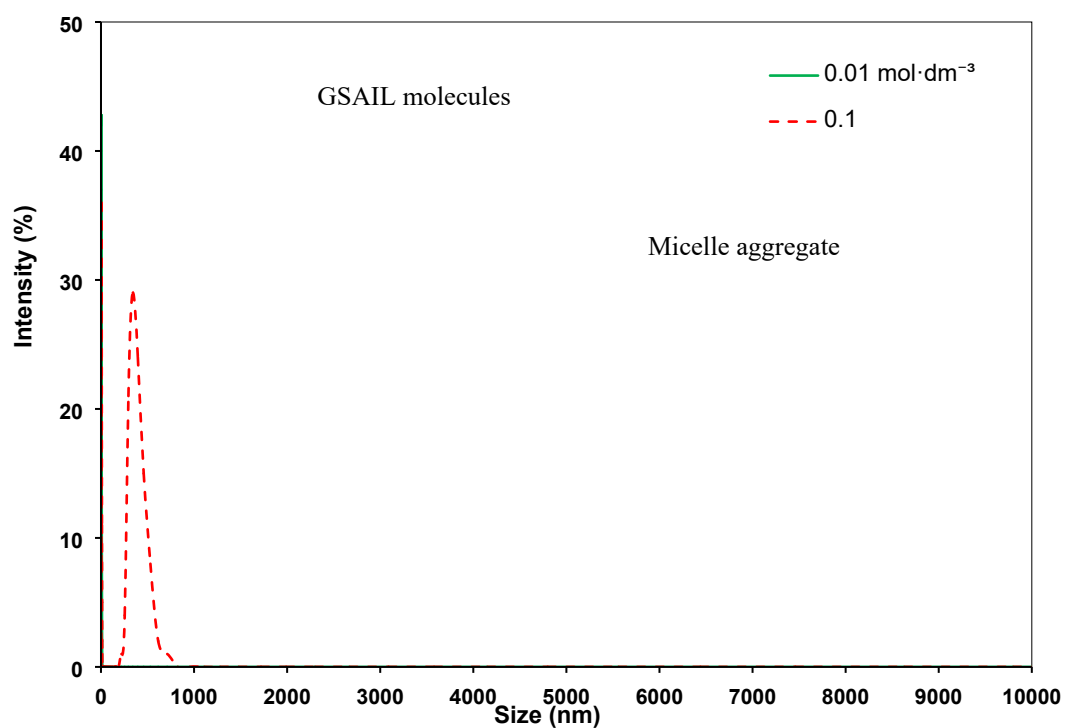

Figure S10. The DLS spectra of the of  $[C_4\text{benzim}-C_6\text{-benzim}C_4][Br_2]$  product before and after CMC.

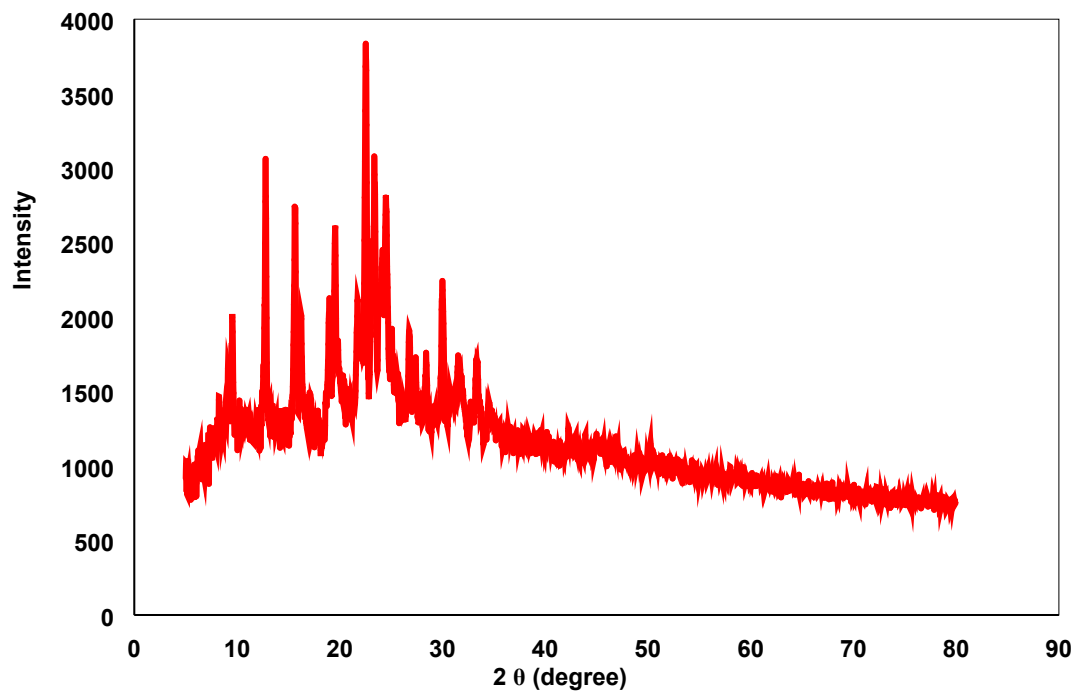

Figure S11. XRD pattern of synthesized  $[C_4\text{benzim}-C_4\text{-benzim}C_4][Br_2]$ .

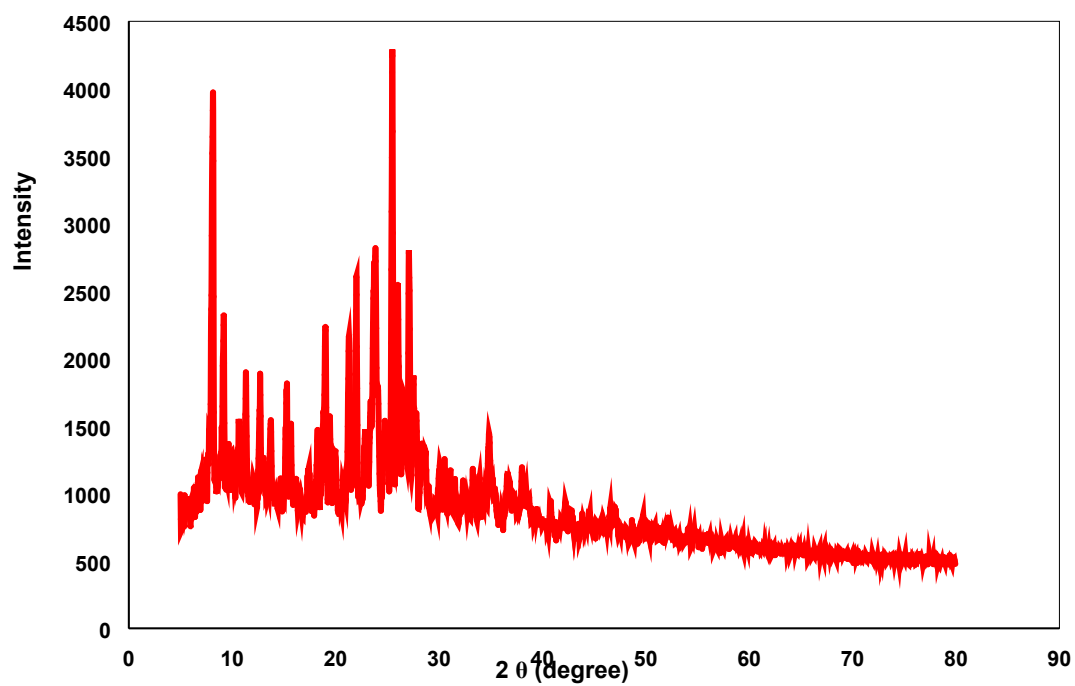

Figure S12. XRD pattern of synthesized  $[C_4\text{benzim}-C_6\text{-benzim}C_4][Br_2]$ .

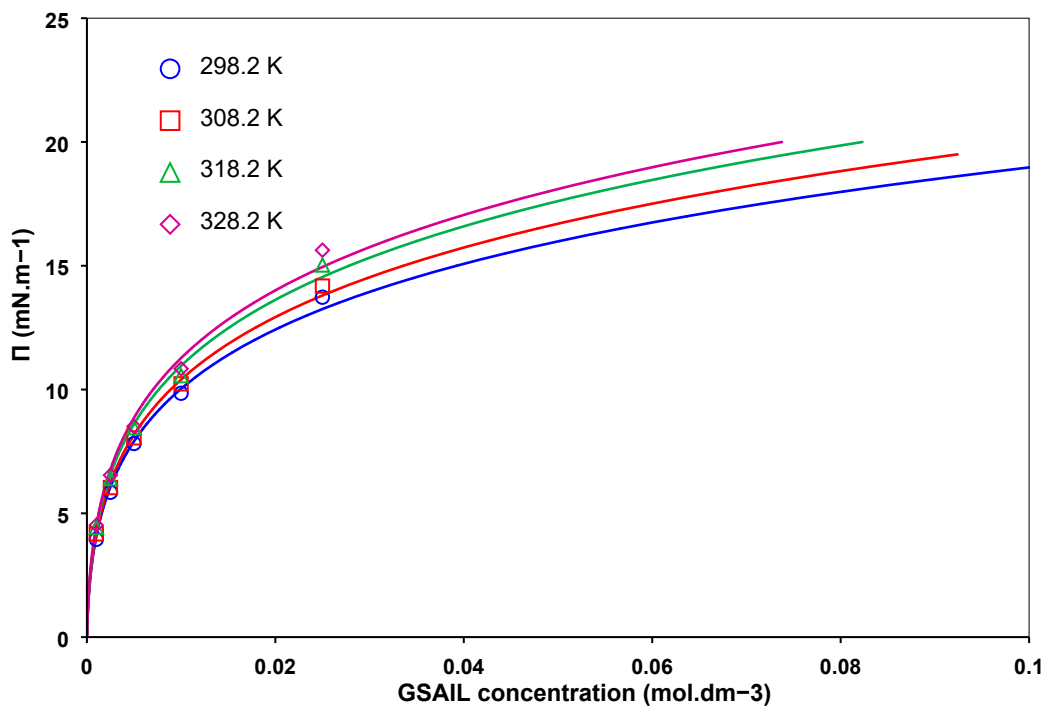

**Figure S13.** Fitted data with the Frumkin adsorption isotherm (solid lines) of [C<sub>4</sub>benzim-C<sub>4</sub>-benzimC<sub>4</sub>][Br<sub>2</sub>] at different temperatures.

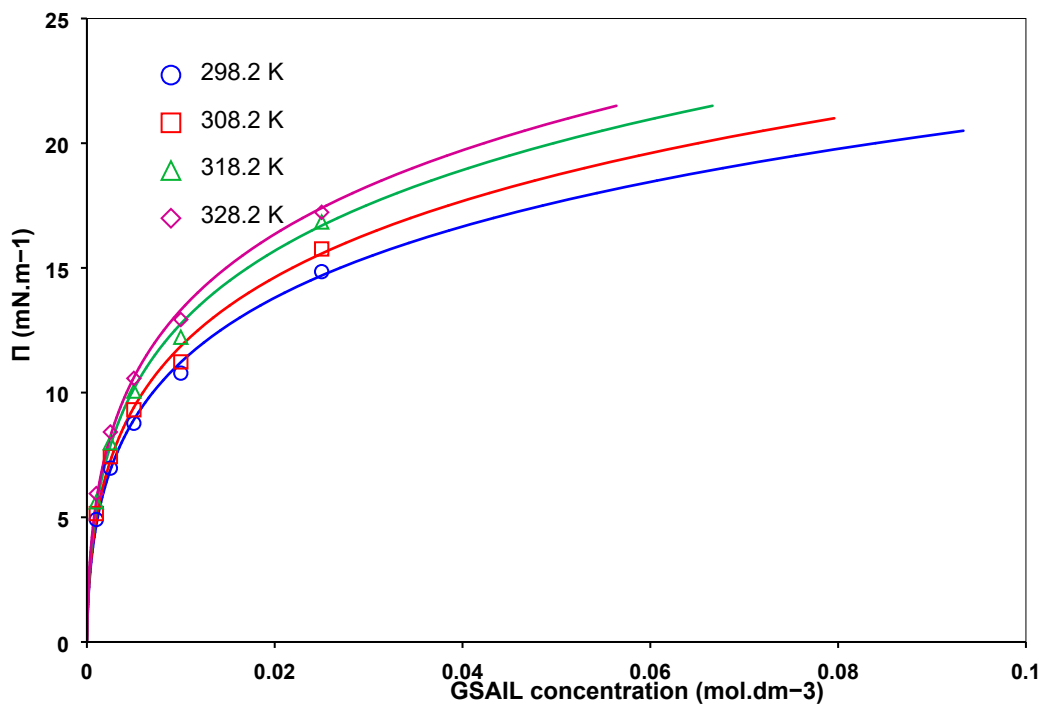

**Figure S14.** Fitted data with the Frumkin adsorption isotherm (solid lines) of [C<sub>4</sub>benzim-C<sub>6</sub>-benzimC<sub>4</sub>][Br<sub>2</sub>] at different temperatures.



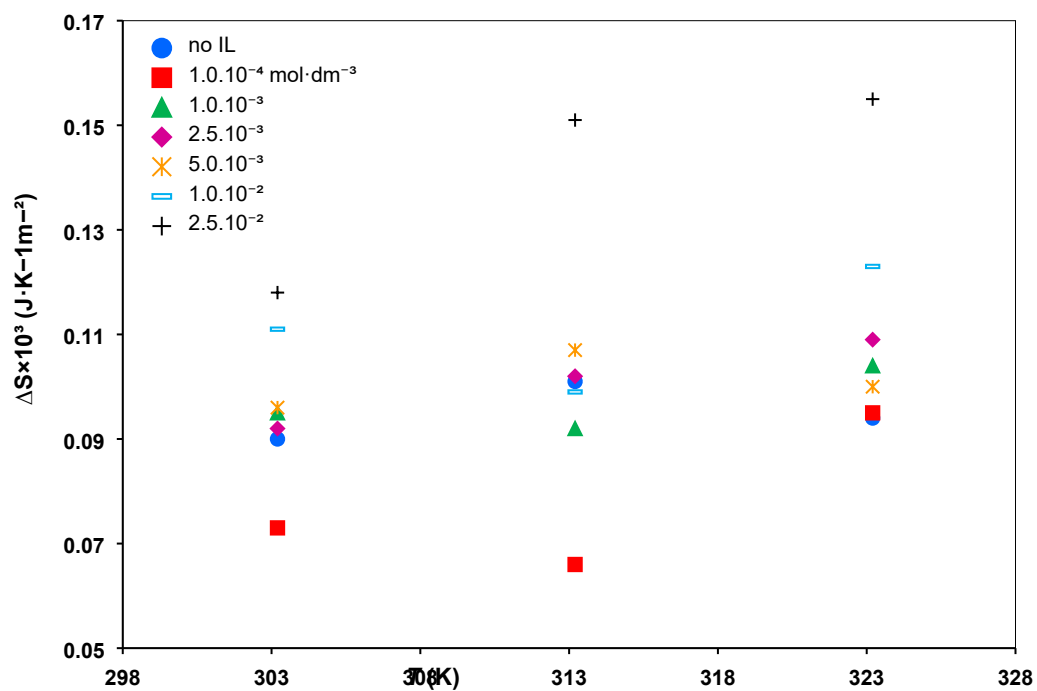

**Figure S15.** The interface entropy change as a function of temperature for different concentrations of  $[C_4\text{benzim}-C_4\text{-benzim}C_4][Br_2]$ .

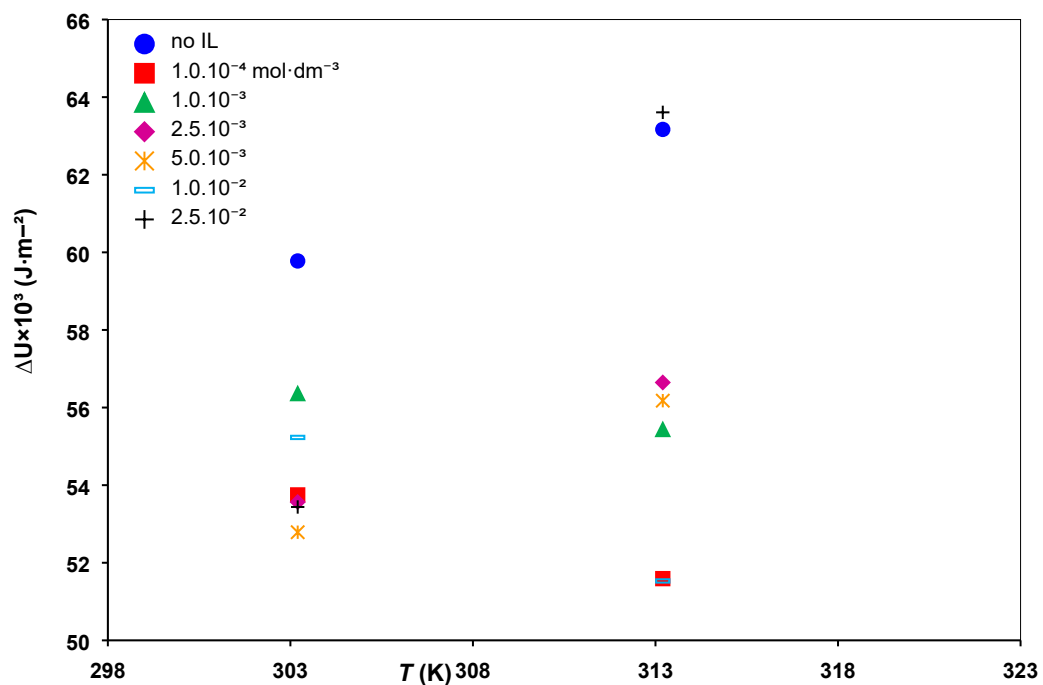

**Figure S16.** The interface energy change as a function of temperature for different concentrations of  $[C_4\text{benzim}-C_4\text{-benzim}C_4][Br_2]$ .

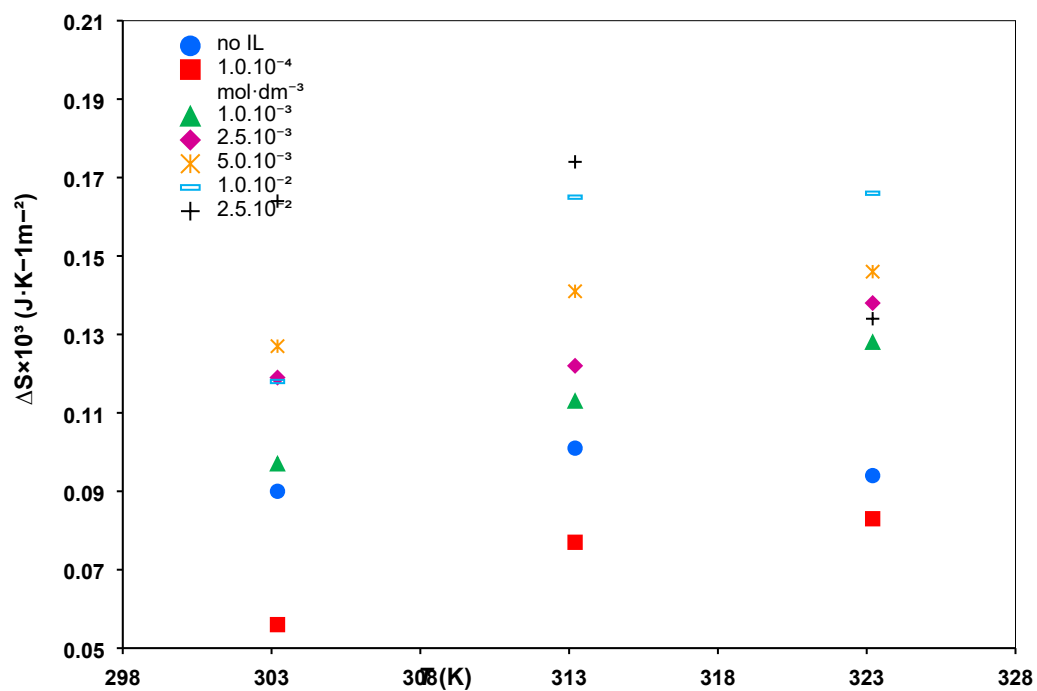

**Figure S17.** The interface entropy change as a function of temperature for different concentrations of  $[C_4\text{benzim-C}_6\text{-benzimC}_4][\text{Br}_2]$ .

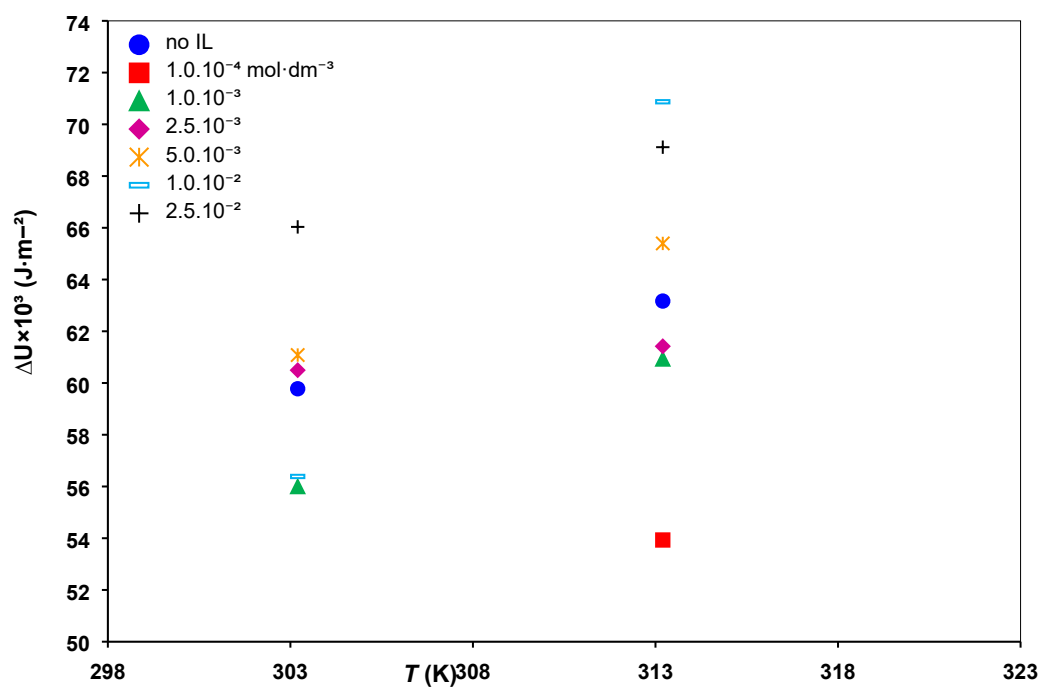

**Figure S18.** The interface energy change as a function of temperature for different concentrations of  $[C_4\text{benzim-C}_6\text{-benzimC}_4][\text{Br}_2]$ .

**Table S1.** XRD data for the benzimidazolium GSAILs.

| Entry                                                                           | $2\theta$<br>(degree) | Peak width<br>[FWHM] (degree) | Size (nm) | Interplanar<br>distance (nm) |
|---------------------------------------------------------------------------------|-----------------------|-------------------------------|-----------|------------------------------|
| [C <sub>4</sub> benzim-C <sub>4</sub> -benzimC <sub>4</sub> ][Br <sub>2</sub> ] |                       |                               |           |                              |
| 1                                                                               | 9.55                  | 0.41                          | 19.16     | 0.93                         |
| 2                                                                               | 12.77                 | 0.42                          | 19.21     | 0.69                         |
| 3                                                                               | 15.63                 | 0.73                          | 11.01     | 0.57                         |
| 4                                                                               | 19.40                 | 0.55                          | 14.76     | 0.46                         |
| 5                                                                               | 19.51                 | 0.75                          | 10.74     | 0.45                         |
| 6                                                                               | 22.52                 | 0.39                          | 20.76     | 0.39                         |
| 7                                                                               | 23.39                 | 0.81                          | 10.06     | 0.38                         |
| 8                                                                               | 24.52                 | 0.22                          | 36.61     | 0.36                         |
| 9                                                                               | 29.96                 | 0.73                          | 11.29     | 0.30                         |
| [C <sub>4</sub> benzim-C <sub>6</sub> -benzimC <sub>4</sub> ][Br <sub>2</sub> ] |                       |                               |           |                              |
| 1                                                                               | 8.14                  | 0.29                          | 27.84     | 1.08                         |
| 2                                                                               | 9.18                  | 0.52                          | 15.32     | 0.96                         |
| 3                                                                               | 11.30                 | 0.49                          | 16.15     | 0.78                         |
| 4                                                                               | 12.70                 | 0.44                          | 18.08     | 0.70                         |
| 5                                                                               | 15.20                 | 0.39                          | 20.54     | 0.58                         |
| 6                                                                               | 19.02                 | 0.49                          | 16.30     | 0.47                         |
| 7                                                                               | 22.01                 | 0.31                          | 25.93     | 0.40                         |
| 8                                                                               | 23.85                 | 0.70                          | 11.56     | 0.37                         |
| 9                                                                               | 25.49                 | 0.21                          | 39.14     | 0.35                         |
| 10                                                                              | 25.95                 | 0.47                          | 17.41     | 0.34                         |
| 11                                                                              | 27.10                 | 0.31                          | 26.18     | 0.33                         |

**Table S2.** GSAILs concentrations, aqueous phase densities,  $\rho_{aq}$ , oil phase densities,  $\rho_{oil}$ , drop equatorial diameter,  $D$ , horizontal drop diameter at distance of  $D$  from drop top curvature point,  $d$ , drop volume,  $V$ , and IFT values,  $\gamma$ , at different temperatures<sup>a</sup> for benzimidazolium GSAILs.

| $T$<br>(K)                                                                      | GSAIL concentration<br>(mol·dm <sup>-3</sup> ) | $\rho_{aq} \times 10^2$<br>(g·cm <sup>-3</sup> ) | $\rho_{oil} \times 10^2$<br>(g·cm <sup>-3</sup> ) | $D$<br>(mm) | $d$<br>(mm) | $V$<br>(mm <sup>3</sup> ) | $\gamma$<br>(mN·m <sup>-1</sup> ) |
|---------------------------------------------------------------------------------|------------------------------------------------|--------------------------------------------------|---------------------------------------------------|-------------|-------------|---------------------------|-----------------------------------|
| [C <sub>4</sub> benzim-C <sub>4</sub> -benzimC <sub>4</sub> ][Br <sub>2</sub> ] |                                                |                                                  |                                                   |             |             |                           |                                   |
| 298.2                                                                           | 0                                              | 99.70                                            | 89.00                                             | 6.36        | 5.14        | 196.25                    | 32.94                             |
|                                                                                 | 1.0×10 <sup>-4</sup>                           | 99.71                                            | 89.00                                             | 6.18        | 4.34        | 154.8                     | 31.98                             |
|                                                                                 | 1.0×10 <sup>-3</sup>                           | 99.73                                            | 89.00                                             | 5.30        | 3.49        | 91.19                     | 28.03                             |
|                                                                                 | 2.5×10 <sup>-3</sup>                           | 99.74                                            | 89.00                                             | 4.59        | 2.78        | 57.38                     | 26.13                             |
|                                                                                 | 5.0×10 <sup>-3</sup>                           | 99.75                                            | 89.00                                             | 5.08        | 3.43        | 82.05                     | 24.16                             |
|                                                                                 | 1.0×10 <sup>-2</sup>                           | 99.77                                            | 89.00                                             | 3.22        | 0.01        | 69.25                     | 22.13                             |
|                                                                                 | 2.5×10 <sup>-2</sup>                           | 100.04                                           | 89.00                                             | 4.44        | 3.04        | 55.53                     | 18.25                             |
|                                                                                 | 5.0×10 <sup>-2</sup>                           | 100.09                                           | 89.00                                             | 4.32        | 3.10        | 53.17                     | 15.28                             |
|                                                                                 | 1.0×10 <sup>-1</sup>                           | 100.10                                           | 89.00                                             | 4.28        | 3.08        | 51.43                     | 14.87                             |
| 308.2                                                                           | 0                                              | 99.37                                            | 88.50                                             | 6.21        | 4.94        | 178.46                    | 32.04                             |
|                                                                                 | 1.0×10 <sup>-4</sup>                           | 99.41                                            | 88.50                                             | 6.17        | 4.31        | 168.21                    | 31.25                             |
|                                                                                 | 1.0×10 <sup>-3</sup>                           | 99.43                                            | 88.50                                             | 4.89        | 3.82        | 107.69                    | 27.08                             |
|                                                                                 | 2.5×10 <sup>-3</sup>                           | 99.44                                            | 88.50                                             | 5.31        | 3.22        | 88.77                     | 25.21                             |
|                                                                                 | 5.0×10 <sup>-3</sup>                           | 99.45                                            | 88.50                                             | 5.00        | 3.39        | 78.77                     | 23.20                             |
|                                                                                 | 1.0×10 <sup>-2</sup>                           | 99.47                                            | 88.50                                             | 5.12        | 3.39        | 82.77                     | 21.02                             |
|                                                                                 | 2.5×10 <sup>-2</sup>                           | 99.74                                            | 88.50                                             | 4.41        | 3.08        | 55.27                     | 17.07                             |
|                                                                                 | 5.0×10 <sup>-2</sup>                           | 99.79                                            | 88.50                                             | 4.59        | 3.28        | 63.40                     | 14.24                             |
|                                                                                 | 1.0×10 <sup>-1</sup>                           | 100.07                                           | 88.50                                             | 4.48        | 3.18        | 58.44                     | 13.81                             |
| 318.2                                                                           | 0                                              | 98.80                                            | 88.00                                             | 6.14        | 4.13        | 162.91                    | 31.03                             |
|                                                                                 | 1.0×10 <sup>-4</sup>                           | 98.91                                            | 88.00                                             | 5.45        | 4.03        | 150.92                    | 30.59                             |
|                                                                                 | 1.0×10 <sup>-3</sup>                           | 98.93                                            | 88.00                                             | 4.88        | 4.85        | 97.44                     | 26.16                             |
|                                                                                 | 2.5×10 <sup>-3</sup>                           | 99.04                                            | 88.00                                             | 4.87        | 3.59        | 92.75                     | 24.19                             |
|                                                                                 | 5.0×10 <sup>-3</sup>                           | 99.05                                            | 88.00                                             | 4.99        | 3.43        | 78.71                     | 22.13                             |
|                                                                                 | 1.0×10 <sup>-2</sup>                           | 99.17                                            | 88.00                                             | 5.12        | 3.40        | 82.85                     | 20.03                             |
|                                                                                 | 2.5×10 <sup>-2</sup>                           | 99.24                                            | 88.00                                             | 4.66        | 3.24        | 64.57                     | 15.56                             |
|                                                                                 | 5.0×10 <sup>-2</sup>                           | 99.49                                            | 88.00                                             | 3.53        | 1.86        | 24.68                     | 12.52                             |
|                                                                                 | 1.0×10 <sup>-1</sup>                           | 99.77                                            | 88.00                                             | 5.79        | 3.55        | 84.20                     | 12.39                             |
| 328.2                                                                           | 0                                              | 98.06                                            | 87.60                                             | 4.42        | 5.75        | 154.18                    | 30.09                             |
|                                                                                 | 1.0×10 <sup>-4</sup>                           | 98.21                                            | 87.60                                             | 4.25        | 3.84        | 125.80                    | 29.64                             |
|                                                                                 | 1.0×10 <sup>-3</sup>                           | 98.33                                            | 87.60                                             | 4.10        | 3.93        | 104.47                    | 25.12                             |
|                                                                                 | 2.5×10 <sup>-3</sup>                           | 98.44                                            | 87.60                                             | 4.63        | 3.46        | 96.28                     | 23.10                             |
|                                                                                 | 5.0×10 <sup>-3</sup>                           | 98.51                                            | 87.60                                             | 5.12        | 3.37        | 82.71                     | 21.13                             |
|                                                                                 | 1.0×10 <sup>-2</sup>                           | 98.67                                            | 87.60                                             | 4.58        | 3.09        | 66.78                     | 18.80                             |
|                                                                                 | 2.5×10 <sup>-2</sup>                           | 98.74                                            | 87.60                                             | 4.55        | 3.23        | 61.16                     | 14.01                             |
|                                                                                 | 5.0×10 <sup>-2</sup>                           | 98.89                                            | 87.60                                             | 4.61        | 3.15        | 61.78                     | 10.87                             |

|                                                                                 | $1.0 \times 10^{-1}$ | 99.17  | 87.60 | 4.60 | 2.97 | 53.30  | 10.72 |
|---------------------------------------------------------------------------------|----------------------|--------|-------|------|------|--------|-------|
| [C <sub>4</sub> benzim-C <sub>6</sub> -benzimC <sub>4</sub> ][Br <sub>2</sub> ] |                      |        |       |      |      |        |       |
| 298.2                                                                           | 0                    | 99.70  | 89.00 | 6.36 | 4.14 | 146.25 | 32.94 |
|                                                                                 | $1.0 \times 10^{-4}$ | 99.72  | 89.00 | 5.99 | 4.01 | 133.62 | 30.76 |
|                                                                                 | $1.0 \times 10^{-3}$ | 99.73  | 89.00 | 5.46 | 3.73 | 103.84 | 27.07 |
|                                                                                 | $2.5 \times 10^{-3}$ | 99.75  | 89.00 | 5.00 | 3.29 | 77.59  | 25.01 |
|                                                                                 | $5.0 \times 10^{-3}$ | 99.77  | 89.00 | 4.83 | 3.19 | 69.62  | 23.21 |
|                                                                                 | $1.0 \times 10^{-2}$ | 99.90  | 89.00 | 4.65 | 3.09 | 62.26  | 21.20 |
|                                                                                 | $2.5 \times 10^{-2}$ | 100.07 | 89.00 | 4.31 | 2.94 | 50.58  | 17.13 |
|                                                                                 | $5.0 \times 10^{-2}$ | 100.31 | 89.00 | 3.91 | 2.75 | 39.14  | 13.56 |
|                                                                                 | $1.0 \times 10^{-1}$ | 100.73 | 89.00 | 3.75 | 2.65 | 33.69  | 12.80 |
| 308.2                                                                           | 0                    | 99.37  | 88.50 | 6.11 | 4.94 | 138.46 | 32.04 |
|                                                                                 | $1.0 \times 10^{-4}$ | 99.42  | 88.50 | 5.25 | 4.35 | 117.38 | 30.20 |
|                                                                                 | $1.0 \times 10^{-3}$ | 99.44  | 88.50 | 5.05 | 4.17 | 141.26 | 26.10 |
|                                                                                 | $2.5 \times 10^{-3}$ | 99.55  | 88.50 | 5.43 | 3.57 | 99.14  | 23.82 |
|                                                                                 | $5.0 \times 10^{-3}$ | 99.59  | 88.50 | 5.33 | 3.57 | 94.33  | 21.94 |
|                                                                                 | $1.0 \times 10^{-2}$ | 99.60  | 88.50 | 5.14 | 3.49 | 85.44  | 20.06 |
|                                                                                 | $2.5 \times 10^{-2}$ | 99.77  | 88.50 | 4.17 | 2.89 | 46.55  | 15.49 |
|                                                                                 | $5.0 \times 10^{-2}$ | 99.98  | 88.50 | 3.67 | 2.57 | 31.96  | 12.06 |
|                                                                                 | $1.0 \times 10^{-1}$ | 100.12 | 88.50 | 3.62 | 2.59 | 30.47  | 11.51 |
| 318.2                                                                           | 0                    | 98.80  | 88.00 | 6.54 | 4.03 | 182.91 | 31.03 |
|                                                                                 | $1.0 \times 10^{-4}$ | 98.92  | 88.00 | 6.11 | 4.01 | 170.60 | 29.43 |
|                                                                                 | $1.0 \times 10^{-3}$ | 98.94  | 88.00 | 6.15 | 4.85 | 169.87 | 24.98 |
|                                                                                 | $2.5 \times 10^{-3}$ | 99.08  | 88.00 | 6.44 | 4.20 | 164.17 | 22.60 |
|                                                                                 | $5.0 \times 10^{-3}$ | 99.12  | 88.00 | 6.35 | 4.26 | 159.32 | 20.52 |
|                                                                                 | $1.0 \times 10^{-2}$ | 99.20  | 88.00 | 5.87 | 3.90 | 125.76 | 18.37 |
|                                                                                 | $2.5 \times 10^{-2}$ | 99.27  | 88.00 | 3.93 | 2.72 | 38.97  | 13.75 |
|                                                                                 | $5.0 \times 10^{-2}$ | 99.61  | 88.00 | 3.76 | 2.61 | 33.86  | 10.52 |
|                                                                                 | $1.0 \times 10^{-1}$ | 99.93  | 88.00 | 3.45 | 2.50 | 26.83  | 10.01 |
| 328.2                                                                           | 0                    | 98.06  | 87.60 | 6.42 | 5.25 | 194.18 | 30.09 |
|                                                                                 | $1.0 \times 10^{-4}$ | 98.35  | 87.60 | 6.35 | 5.22 | 179.53 | 28.61 |
|                                                                                 | $1.0 \times 10^{-3}$ | 98.42  | 87.60 | 6.25 | 5.13 | 154.71 | 23.69 |
|                                                                                 | $2.5 \times 10^{-3}$ | 98.55  | 87.60 | 5.35 | 4.79 | 143.73 | 21.22 |
|                                                                                 | $5.0 \times 10^{-3}$ | 98.62  | 87.60 | 5.12 | 4.73 | 122.68 | 19.07 |
|                                                                                 | $1.0 \times 10^{-2}$ | 98.69  | 87.60 | 5.56 | 4.36 | 95.51  | 16.71 |
|                                                                                 | $2.5 \times 10^{-2}$ | 98.87  | 87.60 | 4.76 | 3.47 | 83.60  | 12.42 |
|                                                                                 | $5.0 \times 10^{-2}$ | 99.01  | 87.60 | 4.90 | 3.40 | 74.89  | 9.05  |
|                                                                                 | $1.0 \times 10^{-1}$ | 99.23  | 87.60 | 3.52 | 2.54 | 28.17  | 8.78  |

<sup>a</sup>The standard uncertainties  $u$  are  $u(T) = 0.1$  K,  $u(\text{concentration}) = 4 \times 10^{-6}$  mol·dm<sup>-3</sup>,  $u(\rho) = 0.01$  g·cm<sup>-3</sup>,  $u(D) = 1 \times 10^{-3}$  mm,  $u(d) = 1 \times 10^{-3}$  mm,  $u(V) = 1 \times 10^{-3}$  mm<sup>3</sup> and  $u(\gamma) = 1 \times 10^{-3}$  mN·m.

**Table S3.** The maximum interface excess concentration,  $\Gamma_{m,F}$ , the minimum interface area occupied by each molecule,  $A_m$ , the Frumkin adsorption equilibrium constant,  $b_F$ , the molecular interaction parameter,  $\beta$ , the Gibbs free energy of adsorption,  $\Delta G_{ads}^\circ$ , and the Gibbs free energy of micellization,  $\Delta G_{mic}^\circ$ , of imidazolium and benzimidazolium GSAILs at different temperatures.

| GSAIL                                                                           | $T$<br>(K) | $\Gamma_{m,F} \times 10^6$<br>(mol·m <sup>-2</sup> ) | $A_m \times 10^{36}$<br>(m <sup>2</sup> ) | $b_F$<br>(dm <sup>3</sup> ·mol <sup>-1</sup> ) | $\beta$ | $\Delta G_{ads}^\circ$<br>(kJ·mol <sup>-1</sup> ) | $\Delta G_{mic}^\circ$<br>(kJ·mol <sup>-1</sup> ) |
|---------------------------------------------------------------------------------|------------|------------------------------------------------------|-------------------------------------------|------------------------------------------------|---------|---------------------------------------------------|---------------------------------------------------|
| [C <sub>4</sub> im-C <sub>2</sub> -imC <sub>4</sub> ][Br <sub>2</sub> ]         | 298.2      | 1.28                                                 | 9.08                                      | 109.5                                          | -1.5    | -39.73                                            | -0.49                                             |
|                                                                                 | 308.2      | 1.80                                                 | 6.48                                      | 421.6                                          | -1.9    | -36.15                                            | -0.51                                             |
|                                                                                 | 318.2      | 2.32                                                 | 5.02                                      | 259.9                                          | -2.5    | -34.74                                            | -0.53                                             |
|                                                                                 | 328.2      | 3.38                                                 | 3.45                                      | 364.8                                          | -6.1    | -37.64                                            | -0.56                                             |
| [C <sub>4</sub> im-C <sub>4</sub> -imC <sub>4</sub> ][Br <sub>2</sub> ]         | 298.2      | 2.78                                                 | 4.19                                      | 476.7                                          | -4.1    | -47.02                                            | -0.003                                            |
|                                                                                 | 308.2      | 3.70                                                 | 3.14                                      | 159.7                                          | -5.0    | -42.98                                            | -0.01                                             |
|                                                                                 | 318.2      | 5.00                                                 | 2.33                                      | 83.1                                           | -6.8    | -40.88                                            | -0.03                                             |
|                                                                                 | 328.2      | 6.25                                                 | 1.86                                      | 92.8                                           | -9.9    | -42.73                                            | -0.06                                             |
| [C <sub>4</sub> im-C <sub>6</sub> -imC <sub>4</sub> ][Br <sub>2</sub> ]         | 298.2      | 1.39                                                 | 8.38                                      | 991.0                                          | -6.1    | -47.02                                            | -0.25                                             |
|                                                                                 | 308.2      | 1.43                                                 | 8.15                                      | 807.9                                          | -7.7    | -42.98                                            | -0.27                                             |
|                                                                                 | 318.2      | 1.54                                                 | 7.57                                      | 684.8                                          | -8.5    | -40.88                                            | -0.30                                             |
|                                                                                 | 328.2      | 1.83                                                 | 6.34                                      | 702.1                                          | -10.2   | -42.73                                            | -0.34                                             |
| [C <sub>4</sub> benzim-C <sub>4</sub> -benzimC <sub>4</sub> ][Br <sub>2</sub> ] | 298.2      | 1.67                                                 | 6.98                                      | 212.4                                          | -4      | -42.99                                            | -9.46                                             |
|                                                                                 | 308.2      | 2.08                                                 | 5.59                                      | 166.1                                          | -4.8    | -43.17                                            | -10.02                                            |
|                                                                                 | 318.2      | 2.44                                                 | 4.77                                      | 148.7                                          | -5.4    | -43.97                                            | -10.62                                            |
|                                                                                 | 328.2      | 2.82                                                 | 4.13                                      | 135.3                                          | -6.2    | -44.78                                            | -11.28                                            |
| [C <sub>4</sub> benzim-C <sub>6</sub> -benzimC <sub>4</sub> ][Br <sub>2</sub> ] | 298.2      | 1.69                                                 | 6.87                                      | 269.2                                          | -3.9    | -44.18                                            | -9.82                                             |
|                                                                                 | 308.2      | 2.13                                                 | 5.47                                      | 222.5                                          | -4.7    | -44.66                                            | -10.43                                            |
|                                                                                 | 318.2      | 2.50                                                 | 4.66                                      | 211.6                                          | -5.3    | -45.84                                            | -11.10                                            |
|                                                                                 | 328.2      | 2.86                                                 | 4.07                                      | 207.4                                          | -6.1    | -47.11                                            | -11.95                                            |
